# Supplementary material for: Development of eSSR-Markers in Setaria italica and Their Applicability in Studying Genetic Diversity, Cross-Transferability and Comparative Mapping in Millet and Non-Millet Species
Source: PLoS One. 2013 Jun 21;8(6):e67742. doi: 10.1371/journal.pone.0067742 (PMC3689721; doi:10.1371/journal.pone.0067742)
Supplement: Table S3 — (XLS) [file pone.0067742.s003.xls]

## Sheet: 419 pp
Table S3. Characteristics of the 447 eSSR markers developed in foxtail millet
Marker ID	NCBI probe ID	Genebank ID	Chromosome	Physical position (bp)	SSR type	SSR motif	Forward primer (5'-3')	Tm (°C)	Reverseprimer (5'-3')	Expected Product size (bp)	Putative functions
SieSSR1	16719049	EC611922	5	30940352	c	(GT)6gatgtttcc(T)12	ACGGTTCCGACATTTTAACG	59.861	ACGAAGACACTTCCAGCCAT	138	related to Splicing factor 3 subunit 1 [Piriformospora indica]
SieSSR2	16719169	EC612011	3	21135931	p3	(CAG)6	TCTCTCCATCAACCAGGGAC	60.048	CTCGACACACACAATCCACC	264	hypothetical protein [Rheinheimera nanhaiensis]
SieSSR3#	16719285	EC612173	NA		p3	(AAG)9	TCCAATACCACTCCTGTGAAAA	59.471	AGGGAGACCGAAAGGGTAAA	122	hypothetical protein [Sorghum bicolor]
SieSSR4	16719403	EC612763	9	51470025	p2	(GT)6	GTTGATGATGCCATCTGACG	60.08	ACGTTTCATTAATCCGCTGC	151	hypothetical protein [Sorghum bicolor]
SieSSR5	16719436	EC612979	NA		p3	(CCT)7	ACGAACAAGAGAGCAATCGG	60.397	GGGAGAGGGAAGATTGGAAG	128	hypothetical protein [Oryza sativa Japonica Group]
SieSSR6	16719447	EC612989	2	47268217	p3	(AAG)5	CGAATGCAAAGAATTGTCAGG	60.623	CAGCAATGAACATCACCTGC	101	unknown protein [Oryza sativa Japonica Group]
SieSSR7	16719458	EC613089	9	18053450	p2	(AC)6	GCATTACATGTATAGTGTCAAGCA	57.03	TGTGTCATCGGTGATGTGAG	102	No homology
SieSSR8a	16719483	EC613239	8	38751009	p3	(CAT)5	CGAGCAGAAAGAAATTTGGC	59.96	TCCATGAAAGTCGTGGAGAA	214	hypothetical protein [Sorghum bicolor]
SieSSR8b	16719484				p3	(TTC)5	CTGCTACTTCAGGTCGGGAG	60.005	GCCAAATTTCTTTCTGCTCG	264
SieSSR9#	16719485	EC613308	5	44713000	p4	(TCCA)5	AAAGAGAGGCCTTGCGTGA	61.071	GGAACAGATATCCTTTTCACTCTT	100	hypothetical protein [Sorghum bicolor]
SieSSR10	16719050	EC613443	2	13905651	p3	(ATC)5	TGGTCGTTTTGTTTCAGCAG	59.881	TGCTTGGGACTGAAGGATTC	220	hypothetical protein [Oryza sativa Indica Group]
SieSSR11*	16719063	EC613675	9	48417819	p3	(GCT)5	TCCAAATCCCATCATCAGGT	60.135	GACAGAGAAGGAGGTGCAGG	164	hypothetical protein [Zea mays]
SieSSR12#	16719075	EC613766	6	29400676	p4	(GCAT)5	CCACCAATCTGTAGCAGCAA	59.864	GTCCTGTGACCCTGGGATAA	107	uncharacterized protein [Zea mays]
SieSSR13#	16719086	GT090827	7	18354519	p2	(AC)4	CTGTGGAGAAAGTCCCATCTGA	50	ATGAAGCTAGCAATTGGACGAT	166	hypothetical protein [Sorghum bicolor]
SieSSR14#	16719098	GT090839	2	35515971	p2	(AC)4	GCAGAGCTGTTCTGTTCTTCAA	50	TCCCCATTTGTTCATAGTTTCC	237	hypothetical protein [Sorghum bicolor]
SieSSR15#	16719109	GT090842	8	32273412	p2	(GA)4	GGAGCTTTATGAGAGCGTGATT	50	TCGGACCAAACTTCACCTTACT	236	hypothetical protein [Daphnia pulex]
SieSSR16	16719120	GT090849	8	37746255	p3	(GCT)5	CTGGGATGACCACTGGATCT	59.92	ACTGGCATCTCACAGCACAG	149	hypothetical protein [Sorghum bicolor]
SieSSR17#	16719131	GT090885	9	1160443	p2	(GT)4	CCAACCAAGTCAGTCCTTAGGT	50	AGCATAACACAAGATCCCATCC	100	No homology
SieSSR18#	16719143	GT090943	8	36541963	p2	(CT)4	ACAGGTGGGTGGGTAGAGAATA	50	TGTCATCAGTTCACCAACTTCC	236	Cell wall-associated hydrolase, partial [Medicago truncatula]
SieSSR19a*	16719166	GT090955	9	50847183	p3	(GCT)6	AAGGTTGCTTACACGGCATC	60.14	GTTCCAGGTGCTCCACAACT	200	prMC3 [Zea mays]
SieSSR19b	16719167				p3	(TAC)5	CGTAGTTCAAAGTCACATACACTGG	60.029	AACACTCGCCGTGTTAATCC	118
SieSSR19c#	16719168				p3	(TAC)5	TTCAAAGTCACATACACTGGAG	50	CACAACTGCCACCTGTCCCA	232
SieSSR20#	16719170	GT090967	3	21135868	p3	(CAG)6	GAATGTTAGATGAATTTCCTCTGGG	50	GCGATGGCATGGCTCATT	229	tRNA pseudouridine synthase B [Streptococcus salivarius M18]
SieSSR21#	16719181	GT090973	5	10973987	p2	(AC)4	ACGAATCTACGCCACACAAGTT	50	GCGAATTTACTGTTTCCGGTAG	104	No homology
SieSSR22#	16719192	GT090977	9	39052034	p2	(AT)4	CTAAAGGAAGGAACAAACGAGA	50	CTTCATTCGCCGACTTTATTTC	289	hypothetical protein [Oryza sativa Japonica Group]
SieSSR23#	16719204	GT091044	9	13594065	p3	(GTC)5	CCTTTTGTATCTACCTACCT	50	GTCTGCTTGTTCTCTTTAAC	407	No homology
SieSSR24#	16719215	GT091049	9	10310839	p2	(CT)4	GAAGCATATCCCTGTCTGATCC	50	ACACCACAGTTACAGCAGTTGG	249	No homology
SieSSR25#	16719228	GT091050	NA		p2	(GA)4	CTGAACCTGTTACTCACGCAAC	50	CAGGACTTATCATCCGAACCTC	249	hypothetical protein [Burkholderia multivorans]
SieSSR26#	16719240	GT091083	1	34006429	p2	(AT)4	CTTTGTTGTTTGCTCTGGTACG	50	TACACAAGGATCACAACGTGAC	162	hypothetical protein [Ailuropoda melanoleuca]
SieSSR27#	16719251	GT091092	2	32801334	p2	(AC)5	TGAATAGCTAGCAGGCTAGTAGAGG	50	CCATGCACCTAGCTCTTGTTTA	166	1-aminocyclopropane-1-carboxylate oxidase [Oryza sativa]
SieSSR28#	16719262	GT091119	5	7303528	p2	(CA)6	CGCGCCTGACTTAATCTTATTC	50	GCAACTTGCAAGACATCAAT	102	No homology
SieSSR29#	16719274	GT091124	2	32801499	p2	(GT)5	CCATGCACCTAGCTCTTGTTTA	50	TGAATAGCTAGCAGGCTAGTAGAGG	166	hypothetical protein [Chloroherpeton thalassium]
SieSSR30#	16719286	GT228097	5	13960844	p3	(CTG)5	TGAAGCCCCTCAAGTTCGACAA	50	AGGTAAAGACCAGCGCGTAATC	294	S-adenosylmethionine synthetase 2 [Triticum monococcum]
SieSSR31#	16719297	GT228126	8	32893555	p2	(TA)4	CCACACTCAACTTATTTTCCCATC	50	TAGCTACCAAGTGAGGCTTGTG	217	acyl coenzyme a oxidase [Oryza sativa Indica Group]
SieSSR32	16719309	GT228152	5	7303502	p2	(AC)6	CATCTCGACCGAGAAGATCAG	59.958	CTACAGGTGCCGCGACTT	151	hypothetical protein [Sorghum bicolor]
SieSSR33#	16719322	GT228158	9	46405937	p3	(AAG)4	GAAATCTGATGTGGATGGTGAG	50	GACAGCGGCACCAAAATTTAAA	275	No homology
SieSSR34#	16719334	GT228159	8	40488837	p2	(GT)4	AGCGGACAAGCCTAAAATGATA	50	AAGCAATGAGAGATGCTTGTCA	206	unknown protein [Oryza sativa Japonica Group]
SieSSR35#	16719346	GT228210	7	34092830	p2	(TG)4	ACAAGCGGTGATTTTCTTGAGT	50	ACACATCACAAAATGGATGCAG	225	hypothetical protein [Sorghum bicolor]
SieSSR36#	16719358	GT228213	8	28997505	p3	(CAC)4	AAATAAGAGTTGTGTCTTCC	50	ATAAAGGAACACTTGAGGAC	162	hypothetical protein [Sorghum bicolor]
SieSSR37#	16719369	GT228238	2	42481251	p2	(GT)4	CCTCGAATGACCCTAAGTCTTG	50	GTGTCATCAGATCACCCATGTC	187	bHLH-HALZ myc like protein [Oryza sativa Japonica Group]
SieSSR38#	16719381	GT228240	2	5041514	p2	(GT)4	GGTATCCATTGATGGCTCAAAT	50	TTCTTGCTGCCCCTAGTAAGAG	200	TPA: hypothetical protein [Zea mays]
SieSSR39#	16719392	GT228261	3	83757	p2	(GT)4	AGAAGAAGACGGACGGCTAAGT	50	CACGTGATAACACAAACACACA	223	thionin-like protein [Triticum aestivum]
SieSSR40#	16719404	GT228296	3	5865110	p2	(GT)4	GGCATGGCCCTAACTAGATTATT	50	ACTGGGTCACAACCTACGTCTT	198	beta-cyanoalanine synthase [Hordeum vulgare]
SieSSR41#	16719415	GT228307	9	55249959	p2	(AG)4	GGATTGTAAACTAGGTATGG	50	TCCACAAATAAGAGAACTTG	119	hypothetical protein [Streptomyces bingchenggensis]
SieSSR42#	16719426	GT228319	6	7503762	p2	(GT)4	TCTCTTCTCCTCTGCTTTTCGT	50	CCAAACAGTGATGAGGGAAAAT	191	No homology
SieSSR43#	16719428	GW787530	NA		p2	(GA)10	TGCTTACGCGTGGACTACAG	60.073	TTGAAGTTAAAGTGTGTGGCG	260	No homology
SieSSR44#	16719429	JK547066	7	23619468	c	(TC)10(TG)10	CTTTTGCTGCATGTGCATTT	59.879	GCATGGAAAGATTGCTGTCA	262	hypothetical protein [Sorghum bicolor]
SieSSR45a	16719430	JK547097	4	39328782	p3	(TGC)5	GCCTTGGACCAACAACAAGT	60.012	TTCATGGAATGAGCAGCAAG	230	uncharacterized protein [Zea mays]
SieSSR45b	16719431				p1	(T)11	TCCGCAAGAGAAACCAATTC	60.192	ACTTGTTGTTGGTCCAAGGC	168
SieSSR46	16719432	JK547313	NA		p3	(AGC)5	AAGATACCGCACGACCAAAC	60	GCTGCTGATGTTACCTGCAA	238	uncharacterized protein [Zea mays]
SieSSR47	16719433	JK547389	9	24767720	p3	(TGT)5	CTTCTGCTTCTAGATCGGCG	60.249	GGTTGCACAGCACAGATCAC	130	No homology
SieSSR48	16719434	JK547397	9	46097252	p3	(TCA)5	TTGCCTGTTAACATGGTGGA	59.964	TGTTGCTTGCTCCTTTGATG	146	No homology
SieSSR49	16719435	JK547595	9	1256771	p3	(CTA)6	CCTGCTTCGCTTCACTTACC	60.015	CAGCATGGCAAAGCAGAGTA	277	hypothetical protein [Sorghum bicolor]
SieSSR50	16719437	JK547782	NA		p3	(TCG)5	GCTTGATAAGTGGAACCCCA	59.933	GCACAACGTCATTCACTGCT	158	No homology
SieSSR51	16719438	JK547842	9	522260	p3	(GCT)5	GGAGGCTCAAGGAGGAAGAG	60.468	GATCCATGTCATCATCGTCG	102	hypothetical protein [Sorghum bicolor]
SieSSR52	16719439	JK548005	NA		p3	(AGC)5	TAGAAGGTGGTTGTTTGCCC	59.971	AACCCCAAACTGGTTCATCA	248	TPA: hypothetical protein [Zea mays]
SieSSR53	16719440	JK548234	NA		p3	(CAC)5	CCTTCCAGAACGGTTGAAAA	60.081	CTTGAGCTCAGGTCTCGCAT	255	No homology
SieSSR54	16719441	JK548432	9	41629513	p2	(AT)6	CAAGGGTTGGTTCCCTATGA	59.784	AGCAGAACATGTCCGATTCA	263	hypothetical protein [Sorghum bicolor]
SieSSR55	16719442	JK548444	2	36619484	p2	(TG)8	GCACCTTACACGGCAATTTT	60.003	GGAGAGTGGAGTGGCATTGT	169	glutathione peroxidase 4 [Zea mays]
SieSSR56	16719443	JK548631	3	47872627	p3	(AGC)6	AAACGTCATTGAAACCTGGG	59.83	AGGTGTGGGAACTCATCAGC	265	uncharacterized protein [Zea mays]
SieSSR57	16719444	JK548635	9	20418530	p2	(CT)7	CCCTCTCTCCCTCCGTAAAC	60.067	ACTCAGGGGTCTTGTTGGTG	223	No homology
SieSSR58	16719445	JK548745	NA		p3	(ATG)7	CGAGATGTGTCAACCCACAA	60.57	TCACCCAAGCCTTGTTATCC	104	hypothetical protein [Sorghum bicolor]
SieSSR59	16719446	JK548762	2	33828122	p2	(TG)6	CCTGCATCAGAGTTGCTGAA	60.136	TTCAGGATCCACTCCTTTGG	180	No homology
SieSSR60	16719448	JK548765	NA		p2	(GA)6	AAGGTATGAACGTGAACGGG	59.853	CTACCCCTTCGCTTCCTTTT	266	hypothetical protein [Sorghum bicolor]
SieSSR61#	16719449	JK548795	2	43349034	p3	(ACA)6	ACACTGGTTGTGCAGCTGAG	60.096	AAGGCTACCCCAACTTGCTT	268	No homology
SieSSR62	16719450	JK548796	9	5051140	p3	(TGT)6	ACTGCACTGCACCATCAAAG	59.905	GAAGCATGATGCAGATTCACA	168	No homology
SieSSR63	16719451	JK549127	1	41726889	p3	(TCA)5	GTATGGTTGCAATGCTGGTG	59.995	AAGGCATGCAAGACCTGGTA	203	hypothetical protein [Sorghum bicolor]
SieSSR64	16719452	JK549136	1	159922	p3	(CGA)6	GAGAAGCAGATGATCCAGGG	59.761	CAAAACTCTGCCTTTCCTGC	171	uncharacterized protein Zea mays]
SieSSR65#	16719453	JK549267	9	53166304	p4	(ATGG)5	TCACAAACAACGGCATCTCT	59.293	GCACAAAAGAGCTCTGGGAC	254	hypothetical protein [Oryza sativa Indica Group]
SieSSR66	16719454	JK549333	NA		p3	(CAG)6	TGGTCAGACAGACGATACGG	59.701	AGCTTGGCCAACATAGAACG	280	uncharacterized protein [Zea mays]
SieSSR67	16719455	JK549568	5	29121530	p2	(AG)7	AGAGAGACAGGCACACAGGG	60.458	AGGCTGTTTGGTGGTTTTTG	134	ser/thr protein phosphatase1 [Zea mays]
SieSSR68	16719456	JK549711	NA		p3	(AAC)9	GTTCGTTCACCGACAAGGAT	59.973	ACCTAAACTGACGTGGGGTG	264	dithiobiotin synthetase [Corynebacterium diphtheriae bv. intermedius str. NCTC 5011]
SieSSR69	16719457	JK550040	NA		p3	(TGC)6	TTCACAAGGGAGGGTAGTGC	60.111	TGCCGAATATGACCTTCCTC	246	hypothetical protein [Sorghum bicolor]
SieSSR70	16719459	JK550041	4	33794378	p3	(CAG)6	TGCCGAATATGACCTTCCTC	60.036	CAGGAAGTGGCAACACTGAA	161	uncharacterized protein [Zea mays]
SieSSR71	16719460	JK550547	9	4188427	p2	(GA)6	GCCGCTGAATGAACAAAAAT	60.081	TGTCCACGGCATCTTGTTAG	156	hypothetical protein [Oryza sativa Indica Group]
SieSSR72	16719461	JK550928	NA		p3	(TAA)5	CGCTAATCCTCTCAACTCGC	60.118	GGTGGTGATGTCAGAAACGA	103	uncharacterized protein [Zea mays]
SieSSR73a	16719462	JK551331	NA		p3	(GCA)5	CAACTTCATGGCGAACAAGA	59.84	ACCAAACCTGAACTCCGATG	271	hypothetical protein [Sorghum bicolor]
SieSSR73b	16719463		NA		p3	(GCC)6	GCACAGCGACTACAGCTACG	59.835	ACATGTTCATCAGCTCTGCG	236
SieSSR74	16719464	JK551332	9	47654711	p3	(TGC)5	ACCAAACCTGAACTCCGATG	59.966	CAACTTCATGGCGAACAAGA	271	hypothetical protein [Sorghum bicolor]
SieSSR75	16719465	JK551347	6	10223297	p2	(AG)6	CGTACAGCACTGCCATCACT	59.929	TGACTGATGCAAACGCTAGG	191	hypothetical protein [Sorghum bicolor]
SieSSR76	16719466	JK551522	NA		p3	(CAT)6	TAATGATGGCGTCATGCTGT	60.104	GTGTAAGGATGTGAGCGGGT	244	thioredoxin h-like protein [Zea mays]
SieSSR77	16719467	JK552024	7	35219957	p2	(AC)8	GATCGCAAAGCAAAAGGTTG	60.752	GGGACAGGGACAGGGTTAAT	179	hypothetical protein [Sorghum bicolor]
SieSSR78	16719468	JK552066	NA		p2	(GT)6	ACGGTTGCTTGCAGTTTCTT	59.92	TTTGAGTCTGCCTTGTGTGG	127	hypothetical protein [Sorghum bicolor]
SieSSR79#	16719469	JK552340	3	2925908	p3	(TGT)9	AATGATAATTGGCCGTGAGC	59.929	CCATAGAGGCGGTTGCTAAA	239	hypothetical protein [Zea mays]
SieSSR80a	16719470	JK552566	NA		p3	(CAG)5	AGAGGAGTTCAAGGAAGGGC	59.817	GCTACTGATCCCCACACCAT	230	uncharacterized protein [Zea mays]
SieSSR80b	16719471		NA		p3	(GAT)5	GGAGCAGATTTGGATGAGGA	60.158	TTCCCTTCATTGCTGAAACC	220
SieSSR81	16719472	JK552672	3	18145403	p3	(CCT)5	TCCCCTTCATCTGATTTTCG	60.006	CGAGGAAAGACGCCTAACTG	176	transcription factor/ transcription initiation factor [Zea mays]
SieSSR82a	16719473	JK552918	5	39755730	p1	(T)16	ACCAGTCCACCATCTCGTTC	59.969	GGTCCTGGAAAATTTTGGCT	122	No homology
SieSSR82b	16719474		3	47937579	p2	(AC)7	CGGTTTCATGGTTTGAAAGG	60.336	TGTACAGGTGGTAAACGCCA	117
SieSSR83a	16719475	JK553108	1	369395	p1	(T)11	AGACAAGCCAGCAGACCAAT	59.874	GGTGAAAAAGGTGCTTGGAG	203	hypothetical protein [Sorghum bicolor]
SieSSR83b	16719476				p3	(CTT)5	CTCCAAGCACCTTTTTCACC	59.711	GGATGACAAGGACCACAAGG	152
SieSSR84#	16719477	JK553882	NA		p3	(AGC)7	GTTACCGTGTCCCACCAAAC	60.134	ATGATAGGAGTGGTGGCTCG	202	unknown [Zea mays]
SieSSR85	16719478	JK553949	2	32116610	p2	(AC)6	TTACACATCAAAACGCTGGC	59.735	TGAGGTGATGGCGATGTTTA	163	hypothetical protein [Sorghum bicolor]
SieSSR86	16719479	JK554026	8	2983029	p2	(GT)6	ATTTGCACTGTTGCTTGCAG	60.058	GCCTTGTGTGGAATAGTACGAC	124	serine/threonine-protein kinase SAPK4 [Zea mays]
SieSSR87	16719480	JK554128	2	32178945	p2	(TC)8	AAAGCACCCGAAGCAATAAA	59.72	GCAGGTCTCCATGATTCGAT	273	No homology
SieSSR88	16719481	JK554220	NA		p2	(CT)6	ATACTTTTGCTCACCCCGTG	59.993	CAACATCCTTTCTCTCTCACACA	169	coiled-coil domain-containing protein 111 homolog [Brachypodium distachyon]
SieSSR89#	16719482	JK554231	5	41660054	p5	(AAGGT)5	CAAGACCTCAACCAAGGGAA	60.081	GGAATCCAAGGAGGAAGAGG	254	Leucine Rich Repeat family protein, expressed [Oryza sativa Japonica Group]
SieSSR90	16719486	JK554293	NA		p3	(CGC)5	TCATCCAAGACGATCGGAAT	60.426	ACGCATAGGCACATGACAAG	262	TPA: hypothetical protein [Zea mays]
SieSSR91#	16719487	JK554568	1	30582420	p3	(TGC)7	CTGCTTCCTGTCTTCCTTGG	59.982	AAGGCGCTTCTCATATCCCT	132	S-adenosylmethionine decarboxylase [Saccharum arundinaceum]
SieSSR92	16719488	JK554685	NA		p3	(CTC)5	GAACAGAACGAGAAGTCGGC	59.997	CAGAATGCTCGTGGAGAACA	156	TPA: hypothetical protein [Zea mays]
SieSSR93	16719489	JK554957	5	37891501	p3	(ACG)5	TCACTTCTTGGCGACCTTCT	59.989	ATGAAAACAGTGGAGCTGGG	273	senescence-associated protein DIN1 isoform 1 [Zea mays]
SieSSR94	16719490	JK555032	5	10753532	p3	(CAT)5	CGACTCTGCATCTACCCCAT	60.096	ATCCGGGGTGAAAATGTGTA	205	hypothetical protein [Sorghum bicolor]
SieSSR95	16719491	JK555093	NA		p3	(CGC)5	TGATGAATGCTAGGCACCAG	59.823	GCGGAGGATGATTATGTGGT	255	hypothetical protein [Sorghum bicolor]
SieSSR96	16719492	JK555293	NA		p2	(AC)7	GCTATTTTGACGGGTGCAAT	59.967	GTTTGCCGTTCAGCCAGTAT	268	No homology
SieSSR97	16719493	JK555444	NA		p3	(CAC)5	AGGATGAAGGTGTGTACGGC	59.997	CGGCAGAAAGTACCCACAAT	244	hypothetical protein [Sorghum bicolor]
SieSSR98	16719494	JK555930	3	6362725	p2	(AC)7	GAGCATCCTTGTATTGCACAAA	60.138	CACTCTGCCATCACCTGCTA	278	hypothetical protein [Sorghum bicolor]
SieSSR99	16719495	JK555939	NA		p3	(TGC)6	TTGGGAAAGGATGCCACTAC	59.933	GAGTGCTAGGGGTTCACCAA	235	hypothetical protein [Sorghum bicolor]
SieSSR100#	16719051	JK556024	2	26263926	p3	(TAC)7	GGTGCATGCTTTCTTGTTCA	59.847	CTGTTGCCCCCTTTTTGTAA	120	S-adenosylmethionine decarboxylase proenzyme [Zea mays]
SieSSR101a#	16719052	JK556457	5	4775607	p4	(ATCA)5	GTTAACTTGGCCTTTGCCAC	59.615	TCAGAGGCAGGTTCTTTGGT	236	uncharacterized protein [Zea mays]
SieSSR101b#	16719053				p6	(AAAAAG)5	TCACCGATTCACCGTACAAA	59.964	ACGTGTGGGGAATATGCTGT	139
SieSSR102	16719054	JK556503	NA		p2	(GT)6	TTCTTTGGACACACATCCCA	59.935	CCATCAGCCTTTAAGCTTGC	273	uncharacterized protein [Zea mays]
SieSSR103	16719055	JK556896	4	3657275	p3	(AAC)5	GGCTGGAAAAACCACAAAGA	60.088	CGAGCTGGGTATGCTTCTGT	265	hypothetical protein [Oryza sativa Japonica Group]
SieSSR104	16719056	JK556903	NA		p3	(TGA)5	GCGCCTTGTAAAAACCTTGA	60.244	GCAGCATTGGAAGGCTTATC	182	No homology
SieSSR105a	16719057	JK556904	9	46256298	c	(TCT)6taggagtttcggaaacttcagcatcaccattggttgccacattctcctgctcctgggtctcctctagctcatgcttcttt(TTC)5	CTTCTTCCCTTCAGTGGCTG	59.982	GATAAGCCTTCCAATGCTGC	213	hypothetical protein [Sorghum bicolor]
SieSSR105b	16719058				p3	(ATC)5	GCAGCATTGGAAGGCTTATC	59.813	GCGCCTTGTAAAAACCTTGA	182
SieSSR106	16719059	JK557131	1	7985690	p2	(AC)6	TGCACAAATAACAGGTCCCA	59.964	TGAGATAATAACCTGCGCCC	170	hypothetical protein [Plasmodium vivax Sal-1]
SieSSR107	16719060	JK557234	6	496534	p2	(CT)7	GTTCGAACAAGCATGCAGAA	59.995	TAGAAATGTTGCCCCTTTGC	245	No homology
SieSSR108	16719061	JK557316	4	31601473	p3	(TGT)6	CCAACTTGCTTGGGAGAAAA	60.22	GATCGACCATCTCGTCAGGT	214	hypothetical protein [Sorghum bicolor]
SieSSR109	16719062	JK557317	NA		p3	(CAA)6	GATCGACCATCTCGTCAGGT	60.08	CCAACTTGCTTGGGAGAAAA	215	hypothetical protein [Zea mays]
SieSSR110	16719064	JK557322	NA		p2	(TA)6	AGTCGGATGCATCTTAGGGA	59.653	GCTTTGACATTCCAGCACAA	140	No homology
SieSSR111	16719065	JK557323	NA		p2	(AT)6	AATCACTGGCAACCCAGAAG	60.111	GTCGGATGCATCTTTAGGGA	208	putative makorin RING finger protein [Oryza sativa Japonica Group]
SieSSR112#	16719066	JK557369	1	37325838	p3	(TGT)7	TGTTAGGTGCTCTTTTCGCA	59.609	CAGCGATGGCTAAGATGTGA	182	putative transposase [Zea mays]
SieSSR113#	16719067	JK557532	NA		p4	(CTAG)5	TGCCGTACGTGTCTGTTCTC	59.905	GCACAACAGAGCCTGGAACT	128	hypothetical protein [Sorghum bicolor]
SieSSR114#	16719068	JK557553	NA		p4	(AAAC)5	TGAAGACATACACCAACGGG	59.415	AGCAGTTTTGGGGTCTGTTG	171	uncharacterized protein [Zea mays]
SieSSR115	16719069	JK557835	NA		p3	(AGC)7	GTTACCGTGTCCCACCAAAC	60.134	ATGATAGGAGTGGTGGCTCG	202	unknown [Zea mays]
SieSSR116	16719070	JK558384	4	331346	p3	(GGT)5	AGAACCAATTCTCAGCACGG	60.255	AAGAATTTTGCACCCGACAG	159	uncharacterized protein [Zea mays]
SieSSR117	16719071	JK558410	3	9394820	c	(T)12ctttttctttttctttttggtattccctctctg(TC)9	AGGTGTGCCATTTCCTTGTC	59.973	ACCTGTACCCGCCCTTTTAT	203	hypothetical protein [Sorghum bicolor]
SieSSR118	16719072	JK558468	9	21483039	p3	(GCC)5	GCTTCTGTCTCCTCTCTCCA	57.215	GACGGCAAGCTTAACCTGAG	119	hypothetical protein [Zea mays]
SieSSR119a	16719073	JK558507	5	5417317	p2	(GT)6	ACGCAGAAGAGAGGACAGGA	60.135	CGTCTCCAGTCGCAATACAA	271	hypothetical protein [Zea mays]
SieSSR119b	16719074				c	(A)16t(A)13	CGACTGGAGACGTGTTGATG	60.309	GCCAGCTGATTTGTTTGGTT	247
SieSSR120#	16719076	JK558623	8	6678705	p2	(AG)6	CTTCCCCCTTCTTCTTGCTC	60.319	CATTCCCCTCAAAGACGAAA	177	wound-induced basic protein [Vitis vinifera]
SieSSR121	16719077	JK558699	9	46948879	p2	(TA)6	TCATCAGGCTCATATTGCCA	60.182	AATTGTTGGGTTTGTAGCGG	145	amelogenin precursor like protein [Zea mays]
SieSSR122#	16719078	JK558861	6	7249774	p6	(GCGCAA)6	TGTTTCAACCTTGCACGAGA	60.427	CCCTAAACCGTAGCCTGTTG	183	uncharacterized protein [Zea mays]
SieSSR123	16719079	JK558971	NA		p3	(CGA)6	GAAGCATTCGACCCCAGTAA	60.074	AAACTCTGCCTTTCTTGCCA	268	hypothetical protein [Sorghum bicolor]
SieSSR124	16719080	JK559187	4	39986435	p3	(AGT)6	CCACCTGATGTAGGCCTTGT	59.989	GAGCTTGCCGAAGAAACAAC	201	uncharacterized protein [Zea mays]
SieSSR125	16719081	JK559560	1	37411370	c	(C)10gtgctcctctcgccctcctcgatccgttttgctacttcccctcaaagattaggcgctgagttgggagatctagagtgggcagccatgg(GGA)5	ACCTTTGTTTTCCCCAAACC	60.068	TCTTCCTCCTCCTCCCTCTC	226	No homology
SieSSR126	16719082	JK559893	6	15356480	p3	(ATG)5	TATAGGGGCACTCTTGTCCG	60.088	GCCCTGTGGTAACCAAGAAT	259	No homology
SieSSR127	16719083	JK559934	NA		p3	(TTC)5	GGTGATCGTCAGTCGGAGTT	60.12	CCGAGTGACAGCATGAAAAA	200	hypothetical protein [Sorghum bicolor]
SieSSR128	16719084	JK560431	NA		p3	(TCA)5	GGCATGCGTGTAACGAGAAT	61.063	CGGCAAAGGAAACAGATCAC	270	No homology
SieSSR129	16719085	JK560457	2	8277166	p3	(GAC)5	ATTCAGGGGACGTTGTTGAG	59.966	TGTCAACTCCACGCAATCTC	278	ras-related protein RIC1-like [Brachypodium distachyon]
SieSSR130	16719087	JK560562	9	2876378	c	(CAG)5caactacaa(CAG)5	TGGCAGATAAGAACCAGCCT	59.836	TGCTGCTGATTAAGGTGCTG	262	hypothetical protein [Sorghum bicolor]
SieSSR131	16719088	JK560949	8	8092853	p3	(ACC)6	AGGGAGAGGAGAGGAGACC	57.311	CTTGTACTTGGCGAAGAGCC	242	unknown [Zea mays]
SieSSR132	16719089	JK561043	NA		p3	(CCA)6	ATGTCCTTCACCAAAGGCTG	60.111	CCTGTGAATCTCCTGGGTGT	174	hypothetical protein [Zea mays]
SieSSR133	16719090	JK561073	NA		p3	(GCA)5	TCTAAGGAGTCACGGCCAAC	60.255	GAAAATCATCGTCGAACCGT	230	drug resistance transporter, EmrB/QacA subfamily [Leptospirillum ferrodiazotrophum]
SieSSR134	16719091	JK561087	NA		p3	(GGT)5	CACATGAACGTGAAAAACGG	60.004	GGTACAAACAAAGGAGGGCA	168	hypothetical protein [Sorghum bicolor]
SieSSR135	16719092	JK561130	4	40124657	p3	(ACA)5	GCTTTGCTTTGTTGCATCTG	59.614	ATTGCAGAGGATGCTTGCTT	160	hypothetical protein [Sorghum bicolor]
SieSSR136	16719093	JK561858	NA		p2	(TG)8	CTGTCTGCCTCCTGTAAGGC	60.012	TACTGCCTGCACATCCTACG	219	No homology
SieSSR137	16719094	JK561963	3	26609512	p2	(AT)6	CAAGCTGTAGGAGAGGTGGG	59.861	GATTGCTTGAATCACGGCTT	277	No homology
SieSSR138a	16719095	JK562084	3	33109206	p1	(A)23	AGCTGCCTCCACTTGACAAT	59.874	CTCCCTGCACCTCTGTTAGC	203	No homology
SieSSR138b	16719096				c	(GGA)7gagagagacagag(GA)6	GTAACCAGCTCGGTGTCCAT	59.997	ATCCAATGCAGGTAGCCATC	257
SieSSR139	16719097	JK562150	9	15858694	p2	(AT)6	ACAGGAACAAAAGGCGACAC	60.156	TTCAGCCAGGTAAAAAGCGT	172	hypothetical protein [Sorghum bicolor]
SieSSR140	16719099	JK562286	7	32667702	p3	(CAG)5	GAAGCAACGGCTTGAGAGTC	60.142	CTTAAATGCGAAGGCCAGAG	254	hypothetical protein [Sorghum bicolor]
SieSSR141	16719100	JK562443	5	39772204	p2	(GT)6	CATGTGCGTCTCAGCAATCT	60.016	AGCTGATCGGTGCCAATAAC	244	carbohydrate transporter/ sugar porter/ transporter [Zea mays]
SieSSR142#	16719101	JK562591	9	22638055	p3	(TGT)9	TGAAGGAACCCAAAAGTTGC	60.088	GAAAGGGCAATCGACAAAAA	269	hypothetical protein [Sorghum bicolor]
SieSSR143#	16719102	JK562592	NA		p3	(AAC)9	GAAAGGGCAATCGACAAAAA	60.053	TGAAGGAACCCAAAAGTTGC	269	salt tolerance protein [Zea mays]
SieSSR144	16719103	JK562779	9	43125359	p3	(ATG)5	TGGGGAATTTTTGCTGTTTC	59.916	CCGGCAGAAGGTGATGTTAT	242	hypothetical protein [Oryza sativa Indica Group]
SieSSR145#	16719104	JK562862	8	34709601	p4	(TGTA)5	TGTTTTTGGTTGTTGCTTGC	59.752	CACACATCTCATAAGCTCTTGG	248	hypothetical protein [Oryza sativa Indica Group]
SieSSR146	16719105	JK563132	NA		p3	(AAC)5	AAACACAAGGACATTTCGCC	59.978	TATCGAGGAGATTGATGGGG	196	hypothetical protein [Zea mays]
SieSSR147	16719106	JK563164	NA		p2	(CA)6	AACCCTTTACCATCCCTTGC	60.187	TTCAGTTCCAACCACATGGA	113	hypothetical protein [Sorghum bicolor]
SieSSR148	16719107	JK563236	9	5372925	p3	(CTG)6	CGGAAATGGTGATGAACAAA	59.371	TGGATGCTTAGCCACATCAG	262	hypothetical protein [Sorghum bicolor]
SieSSR149	16719108	JK563249	NA		p2	(CT)6	ATTTAAAACATCGGGTCGCA	60.323	GCTCAAAATCACCAGTGGGT	111	hypothetical protein [Sorghum bicolor]
SieSSR150	16719110	JK563289	2	40648464	p3	(AAT)5	ACCTGACGCTACAATTGCCT	59.763	TGAAGGAAAACACACCCACA	258	hypothetical protein [Zea mays]
SieSSR151	16719111	JK563354	5	28787427	p2	(GA)6	TCGCAAATACACGGACAAAA	60.111	GCCTGAAGAGTGTTTTTGGG	192	hypothetical protein [Sorghum bicolor]
SieSSR152	16719112	JK563462	NA		p3	(TGG)5	GCGAGAGGCAGCATTATTGT	60.382	AGTGAAACGGTTTGGTCTGG	229	hypothetical protein [Sorghum bicolor]
SieSSR153	16719113	JK563468	4	32974057	p3	(ACA)5	CCTTCAATTTCAGTGCCTGC	60.776	ATCTCTAGCCCACCCCAACT	137	hypothetical protein [Sorghum bicolor]
SieSSR154#	16719114	JK563900	NA		c*	(CTTT)5(T)11*	TTAATGCACAAAGGACGCAG	59.872	TGGGACTGCAGAATTACCTG	244	No homology
SieSSR155	16719115	JK564011	NA		p2	(CT)7	CGCACACAGCGATGAATAC	58.825	CCGGTACTTGTAGTTGCCGT	227	hypothetical protein [Sorghum bicolor]
SieSSR156#	16719116	JK564071	7	26884962	p2	(AC)9	AAGCAAGAAGCCTTGAGATTT	57.391	GAAGGTTTGGTGTGCGTTTT	191	No homology
SieSSR157	16719117	JK564423	2	37657680	p2	(AT)6	ACGTTGTTGCAAGGAAGAGC	60.44	GAGGCTGAACGGAACAAAAG	247	unknown [Zea mays]
SieSSR158	16719118	JK564564	NA		p3	(CCA)8	GGTGTTACTGAAACTCCTGCG	59.788	CCCATTTCCTCTGGAACGTA	106	unknown [Zea mays]
SieSSR159#	16719119	JK564617	NA		p2	(TC)11	CTTGTACGGCCAACTTCCAT	59.993	ATTGCTCCTACGCATGAACC	266	unknown [Zea mays]
SieSSR160	16719121	JK564627	8	3788707	p2	(TG)6	TCCTTTCCATTTGCATCCTC	60.014	TGTCTCATACTTCCCCCTGG	170	No homology
SieSSR161#	16719122	JK565220	9	48344854	p4	(TATC)8	CAGGCCAGTGTTCCATATCC	60.34	AATAGGGCAATGTCCTGGTG	144	hypothetical protein [Sorghum bicolor]
SieSSR162	16719123	JK565896	NA		p3	(CTT)6	AACAACAAGCTTGCCATAGG	57.906	CTGAGGTGGTATGGGCTGAT	173	predicted protein [Hordeum vulgare subsp. vulgare]
SieSSR163	16719124	JK565931	9	57695135	p3	(TAA)7	CAGTTGCAGAAAGGCAGGAT	60.397	TGATGCGATAACTCAGGCAG	225	No homology
SieSSR164#	16719125	JK565951	NA		p3	(GCT)7	AGAACATAGCAATGGGGACG	59.955	TATTCCAAATGCTTGGGCTC	201	hypothetical protein [Oryza sativa Japonica Group]
SieSSR165#	16719126	JK565952	4	1849270	p3	(GTC)5	TCCATCAATGCCCATACAGA	59.883	TTCAGAGAAACCAGGGATGG	278	integral membrane single C2 domain protein [Sorghum bicolor]
SieSSR166	16719127	JK566217	4	39929813	p2	(TA)7	GAGGGCAGCATTCTGATGAT	60.189	CTGAAGGGCTCCAAACTCAG	175	No homology
SieSSR167	16719128	JK566289	NA		p3	(GCT)5	ACCCCAAAACTGGTTCATCA	60.21	GCTGAAGTTGTAGCTTGCCC	228	hypothetical protein [Sorghum bicolor]
SieSSR168	16719129	JK566541	8	175313	p3	(CAG)6	CACTCCTTGAGCGACATTCA	59.984	AACAGATCCATCTGGGTTGC	252	unknown [Zea mays]
SieSSR169	16719130	JK567053	7	34241333	p3	(GCA)6	AGCGAAGAAACCAACCAAAA	59.724	TCCCTTCTACCATCGTCCAG	155	unknown [Zea mays]
SieSSR170#	16719132	JK567250	NA		p3	(CTG)7	AAGGTGGCTTTGGCTACTCA	59.875	AGCCTTCTTACAACCCCCTC	240	putative PHD-finger protein [Oryza sativa]
SieSSR171	16719133	JK567564	NA		p3	(CGG)5	TCATCCGTAGATGGGGTCTC	59.886	GTGGGGATTCTTCTCCTTCC	235	hypothetical protein [Sorghum bicolor]
SieSSR172#	16719134	JK567894	NA		p1	(A)10	GATTTCACGCCCAGAGAAAG	59.813	GCCAAAATGATAGGAAGCCA	243	No homology
SieSSR173#	16719135	JK568134	9	47235916	p2	(TC)9	CCAGGCTATCTTGGAATGGA	60.029	CAACAGTGATGCCATTGACC	207	hypothetical protein [Sorghum bicolor]
SieSSR174#	16719136	JK568331	NA		c	(TTG)5(CTG)5	TAATCGCTGCCTCTTGACAG	59.174	GATCATTAGCCCCACTGGAA	262	hypothetical protein [Sorghum bicolor]
SieSSR175#	16719137	JK568369	NA		p2	(TG)11	CTTCCTCCCTGCAAGATGAG	59.943	TGATTTAACCAAATAAAAGGGACG	266	retrotransposon protein, putative, unclassified [Oryza sativa Japonica Group]
SieSSR176	16719138	JK568560	1	28568656	p3	(TGT)6	GACCACGAACAGATGCACAC	60.171	TATGCAGATTGAGCCAGCAG	261	No homology
SieSSR177	16719139	JK568583	6	35201600	p2	(TA)6	ATCCAAACACCGGAGTCAAG	59.966	AAAATCGCCTGTGCATCATA	224	hypothetical protein [Sorghum bicolor]
SieSSR178	16719140	JK568628	2	5194462	p3	(TGG)7	GGAGAACTGGATGGTCGAAA	60.05	CCTCCATCTGAATAAGGGCA	218	hypothetical protein [Sorghum bicolor]
SieSSR179a	16719141	JK568822	1	39649635	p1	(A)12	GAAGGTAAGCCATGGACCAA	59.933	GAGGAATGGGTTGTTCTGGA	145	hypothetical protein [Zea mays]
SieSSR179b#	16719142				p3	(CAG)7	TCCAGAACAACCCATTCCTC	59.903	ATCCTACTTTATGCGCACGG	242
SieSSR180	16719144	JK569045	7	20671176	p3	(CAG)6	TTAGTGCAGAGGAGGCCTGT	60.012	CATTGGTTGCCAACATTACG	248	hypothetical protein [Sorghum bicolor]
SieSSR181	16719145	JK569363	NA		p2	(AT)6	TTTCAAGAGGTCATCCAGGC	60.195	TGCCTATAGGGATGACGCTT	202	hypothetical protein [Oryza sativa Indica Group]
SieSSR182	16719146	JK569664	NA		p3	(CCG)5	TCAAGACCCCAAACCTCTTG	60.081	TCAACGAACTCAAACTCCCC	227	hypothetical protein [Sorghum bicolor]
SieSSR183a#	16719147	JK569708	5	28994390	p3	(CCG)7	ACCTCCAGACTCGATGGCTA	59.827	TCTCTCCTCTTTGCTCTCCG	151	unknown [Zea mays]
SieSSR183b	16719148				p3	(AGC)5	TGCTTGCAGATGTTTTCCTG	59.988	GCTAGCCATCGAGTCTGGAG	166
SieSSR184	16719149	JK569722	5	28090579	p2	(CA)7	ACCCCACATATGCACACTGA	59.837	ATGCTATGTGGTCCCGAAAG	277	hypothetical protein [Oryza sativa Japonica Group]
SieSSR185	16719150	JK569812	NA		p2	(AC)11	CATGTTTCCTGAGAATGGCA	59.648	AGGCCCTGCTGAGAACTGTA	119	TPA: hypothetical protein [Zea mays]
SieSSR186	16719151	JK570082	7	24290485	p2	(TC)6	ATCACTCCAATTACGACGGC	59.962	GCGAGAGACCAAAGGGAGAT	116	uncharacterized protein [Zea mays]
SieSSR187	16719152	JK570327	NA		p3	(GCT)5	CGCCGCGTTATTACTCATTT	60.116	GCAGCAAATACAACAACAGCA	259	fruitful-like MADS-box transcription factor [Chasmanthium latifolium]
SieSSR188	16719153	JK570779	7	27325007	p2	(GA)6	AAGGGACCTTGGGTGAGACT	59.968	GAGCAAAGGGGTCATCACAT	112	hypothetical protein [Oryza sativa Japonica Group]
SieSSR189	16719154	JK571010	7	32061080	c	(T)12cct(TG)7	AGCAGGATACTGGAGAGGCA	59.973	CAGAGGAAGTGGGTTTCGAC	262	unknown [Zea mays]
SieSSR190	16719155	JK571236	NA		p2	(CA)6	TGCTTAGACAAGGTGCATCG	60.011	TGCTGAACAATGAGGAGCTG	216	hypothetical protein [Sorghum bicolor]
SieSSR191	16719156	JK571298	9	870792	p3	(GAC)6	GAAGCTGCCCATAAGCAAAG	59.982	ACTGCACCCCTTACAGCATC	147	hypothetical protein [Sorghum bicolor]
SieSSR192a	16719157	JK571397	4	39328921	p1	(A)11	GTCCGACCAGGACTTGTTGT	60.009	AGGTGGCGAAAAACAGACAC	203	uncharacterized protein [Zea mays]
SieSSR192b	16719158				p3	(CAG)5	TTCAGCAGCAGGAGTTTGAG	59.314	GCCTTGGACCAACAACAAGT	132
SieSSR193#	16719159	JK571592	NA		p2	(TC)10	GACGAGCCAACGAAGAGC	59.663	GTAGCGGAGTTGAGACGGAG	141	No homology
SieSSR194	16719160	JK571755	2	41050250	p3	(CAG)6	AGGAAAGCTAGAAAAGCCGC	60.116	GTTTGCCAAAGTCAATCGGT	233	hypothetical protein [Zea mays]
SieSSR195	16719161	JK571854	9	55714504	p2	(GT)12	TGAGTATAACACATCGTTTTCACTTT	58.335	GGCAGCTGTTTTTGTTCGAT	228	No homology
SieSSR196	16719162	JK572115	NA		p2	(GA)6	GCATCTATCGTGCATTTGGA	59.652	CATCTCGGAAGAAGGCAAAG	243	TPA: hypothetical protein [Zea mays]
SieSSR197	16719163	JK572263	3	48779992	c	(TTC)5(T)12	CAAGATATTGCCTTGCAGCTC	59.996	GGTGTGGGATGATCTTGTCC	268	hypothetical protein [Zea mays]
SieSSR198	16719164	JK572543	NA		p3	(CCA)5	GACGCCTAACGTTTGATGGT	60	CCGCTTGGTATTGATGACCT	229	hypothetical protein [Sorghum bicolor]
SieSSR199#	16719165	JK572585	8	26840367	p2	(AC)14	ACCCTCCTCAGCCTATCCAT	59.919	GAAAAGAAGGGCTGGGATTC	254	uncharacterized protein [Zea mays]
SieSSR200	16719171	JK572610	NA		p3	(GAT)5	AATGGCTTCGCATATTCAGG	60.06	TTTCTTTCCCCTTCACGTTG	159	No homology
SieSSR201	16719172	JK572840	7	29567643	p2	(AC)6	GACATGGCTTCCCTCAAAGA	60.195	GCCTGGAAGGTGGGTTAGAC	264	predicted protein [Hordeum vulgare subsp. vulgare]
SieSSR202	16719173	JK573434	NA		p3	(CAG)5	TCTGTCGATGTTTGCGAGAC	59.992	TTGGGAGTTGGAGTTGATCC	220	histidyl-tRNA synthetase 2 [Methylotenera mobilis JLW8]
SieSSR203	16719174	JK573571	7	32616264	p3	(GAT)5	ATCCAGGTCTCGTCCATCTG	60.072	CCATTGCCTAGCCTGTTCAT	258	hypothetical protein [Sorghum bicolor]
SieSSR204	16719175	JK573598	9	5797277	p3	(GGT)7	AGGCACCTGCTGTTGCTACT	60.081	GCCATTGCTCAGGTAAGCTC	231	hypothetical protein [Sorghum bicolor]
SieSSR205	16719176	JK574497	NA		p3	(ACT)5	CCTGTACATTCCAAGCCACA	59.566	CAAACCCCATGCTTTTGACT	267	uncharacterized protein [Brachypodium distachyon]
SieSSR206	16719177	JK574560	NA		p3	(TTC)5	TGGTTTGTGAGGGAGGGTAG	59.959	GACGAGACACCTGTCGAAAA	245	hypothetical protein [Sorghum bicolor]
SieSSR207	16719178	JK575285	NA		p2	(GT)7	GCTACAACCAGTCCAGCTCC	59.874	TCAAGATGGGAACAACCACA	202	uncharacterized protein [Zea mays]
SieSSR208#	16719179	JK575411	7	13381233	p5	(AAGAA)5	CATGTTGCTAGCACAAGGGA	59.864	AAGAGAGCGAGCATGGTGTT	198	uncharacterized protein [Zea mays]
SieSSR209	16719180	JK575514	9	4684178	p3	(CAG)5	ATCAACAGCAACTGCACCAG	59.905	GGGGAGGCAATATTTGGAAT	211	unknown [Zea mays]
SieSSR210	16719182	JK575571	9	2876391	c	(CAG)6cttaat(CAG)6	CCAGCCTATGGTGAATGTGA	59.522	TGCTGCTGCTGATTAAGGTG	245	hypothetical protein [Zea mays]
SieSSR211#	16719183	JK575572	NA		c	(TGC)5tgattaaggtgctgctgttgttgtagttgctgctgctgttgtaat(TGC)6tgattaa(GCT)6	TGCTGACATGGTCATTTGGT	59.967	GCATCATCAGCAACAGCAAC	247	hypothetical protein [Oryza sativa Indica Group]
SieSSR212#	16719184	JK575714	NA		p3	(TGC)6	ACAGTGGCATAGGGATCAGC	60.104	TTTGGAAAGGAGAATGGTGG	247	hypothetical protein [Sorghum bicolor]
SieSSR213#	16719185	JK575818	5	26306427	p2	(AC)8	ATAAAACGAAGCAACCACCC	58.952	TACGTGCAGTGTGAGAAGCC	248	auxin-repressed protein [Zea mays]
SieSSR214	16719186	JK575835	3	26056318	p3	(GAA)5	CATTTCCTGGCATCTTCTGG	60.594	CTGGAGGGTGTTAGCCATGT	154	6-phosphogluconolactonase [Zea mays]
SieSSR215	16719187	JK575996	NA		p3	(TCA)5	TAAAGTGGCTGTTGTCGTCG	59.904	GGGAGTGCATTAGCGACATT	225	hypothetical protein [Zea mays]
SieSSR216#	16719188	JK576194	9	48108881	p2	(AC)9	GATCCAACAGCTAGCTCTCCA	59.588	TGCCGAGAAAAGGGTCTCTA	256	sucrose phosphatase [Sorghum bicolor]
SieSSR217	16719189	JK576449	NA		p3	(GTC)5	AGGATTCACCACACCTCGTC	59.969	TCCAGATTTCCCCATCTTCA	107	TPA: hypothetical protein [Zea mays]
SieSSR218	16719190	JK576524	3	21135950	p2	(CT)9	GTCCCTGGTTGATGGAGAGA	60.048	TAAAGGTACGCGTAGGCACC	211	hypothetical protein [Sorghum bicolor]
SieSSR219	16719191	JK576572	8	963893	p3	(CAG)5	CATTCTATTTCCACCTGGGC	59.387	GGTTTGTGAACCCCTACCCT	245	hypothetical protein [Oryza sativa Japonica Group]
SieSSR220	16719193	JK576615	3	6472862	p2	(TC)6	TCCCCAACCAAGCACATTAC	60.755	TATGCCTGGTTTCGCACATA	165	hypothetical protein [Zea mays]
SieSSR221	16719194	JK576758	9	3436870	p2	(TC)6	GCAGCAGTTTAAAGGGACCA	60.249	AAAACACGGCATTGAAGACC	193	endonuclease/exonuclease/phosphatase [Acetobacter aceti]
SieSSR222	16719195	JK576801	7	17575059	p3	(CAG)6	CTACATATCAGCCACCGCCT	60.118	TGGTGGAGGACAAAGGTAGC	135	No homology
SieSSR223	16719196	JK576802	7	17575212	p3	(GCT)6	CTGCATCAGCACCATAGGAA	59.823	CCAATGTACCCTCCACCATC	211	uncharacterized protein [Zea mays]
SieSSR224	16719197	JK577143	NA		p3	(AGT)5	TTTTCGCAATCGCTTAGGTC	60.343	TATGCTTTGCTAGCCCGAGT	144	No homology
SieSSR225#	16719198	JK577191	9	13782772	p2	(CT)10	CGAGCAGAGCACCACGTC	61.846	CAACATGAGAAGGCAGCAAA	171	No homology
SieSSR226a*#	16719199	JK577281	9	45905782	c	(TG)8(AG)13	GCCTTCTGGATGTCCTTCTG	59.803	TCGACAAAAATGGGAAGGTC	164	unknown [Zea mays]
SieSSR226b	16719200				p1	(A)10	GGCACAGTCGTCAAGCATAA	59.871	GCGCTTGCAAAAACTATTCC	260
SieSSR227	16719201	JK577337	NA		p3	(GCA)5	AGCGGCCATGTAAAGTGAGT	59.763	TGGCATCTGCAACTACAAGC	213	No homology
SieSSR228	16719202	JK577424	5	32745578	p3	(CAA)6	TGTGTTAGCATTGGCAGGAG	59.864	AATGGTTTGGAAGATTTGCG	166	No homology
SieSSR229	16719203	JK577809	7	2971262	p3	(ATG)5	AATGTTTTCACATGACCGGG	60.615	GAGTTATCCTCTTCCTTATCCTCC	234	hypothetical protein [Sorghum bicolor]
SieSSR230	16719205	JK577979	NA		p3	(TGC)5	AGATACCGACATGACACGCA	60.144	AGCCAAAATACCTGTGCTGC	177	hypothetical protein [Sorghum bicolor]
SieSSR231	16719206	JK578052	NA		p2	(TG)7	GGACTGGGACTTAATGGCAA	59.933	CGGTCAAACCAGAACAAGGT	157	No homology
SieSSR232	16719207	JK578098	NA		p2	(CA)7	TCACTGTCCAATCGATCGTC	59.637	AAGCATAAGCCTGCAAGGAA	206	regulatory protein GntR [Alkaliphilus metalliredigens QYMF]
SieSSR233	16719208	JK578398	NA		p2	(CA)6	CACGCGAGTGTCGATAAAAC	59.347	TGCAGGTCGTCTTTGATCTG	266	hypothetical protein [Sorghum bicolor]
SieSSR234	16719209	JK578588	NA		p2	(TA)6	CTCCCCGTAGAGTTGGATGA	60.065	AGGGAACCACCAAAATCACA	189	plasma membrane MIP protein [Axonopus compressus]
SieSSR235#	16719210	JK578666	NA		p2	(AG)12	GAGAAGGACAACCTGATCGC	59.81	GCATTGAACCCACGAAGTTT	171	hypothetical protein [Sorghum bicolor]
SieSSR236#	16719211	JK578828	NA		p4	(AATA)5	AAGCGAAATTGCCCTCAATA	59.682	TTGCGTGTGATTAGCTCCAG	254	hypothetical protein [Sorghum bicolor]
SieSSR237	16719212	JK578988	9	34715834	p3	(GCT)5	ACGTCCATGGTCACAACAAA	59.855	TCGCGGCTCATAACAATACA	251	transcription factor MYC7E, putative, expressed [Oryza sativa Japonica Group]
SieSSR238	16719213	JK579140	2	35609185	p3	(CAG)5	CAGTTCCATTTCCACCACCT	59.82	CCAGTTGATGTCGGTGATTG	280	predicted protein [Hordeum vulgare subsp. vulgare]
SieSSR239	16719214	JK579141	8	322674	p3	(CTG)5	CCAGTTGATGTCGGTGATTG	59.96	CAGTTCCATTTCCACCACCT	280	No homology
SieSSR240#	16719216	JK579226	NA		p3	(CTG)9	ACCTCCCAATGCTACGGTAA	59.452	GAACCCTGTCGAGGATTGAA	219	hypothetical protein [Sorghum bicolor]
SieSSR241	16719217	JK579406	NA		p2	(GA)6	AAAAGGAAAAGAGGCCGAAG	59.829	TGCACCGCTCTGAAGAGTAA	274	hypothetical protein [Sorghum bicolor]
SieSSR242a	16719218	JK579411	6	33098598	c	(TG)7(T)11	CTGGGGAGGTACCATGTTTG	60.224	TCAGTACATAACATACTGGCGTTG	273	unknown [Zea mays]
SieSSR242b	16719219				p1	(A)11	GATCATTTGATCCACTGGGG	60.135	ACACACACACACATACCGGC	244
SieSSR243#	16719220	JK579457	8	31837454	p6	(GCTTGC)6	TTCTGTAGCAGCCATAGGGG	60.227	TGTTTCAACCTTGCACGAGA	149	hypothetical protein [Plasmodium vivax Sal-1]
SieSSR244a	16719221	JK579458	6	30126974	p1	(T)12	ACGGGTTGCGTAGCTTTATG	60.152	TGGATCACTTGTGTGCATGA	203	No homology
SieSSR244b	16719222				p3	(TCT)5	CTGCAGCTTTGGGTCATCTT	60.397	GGACTGTCAGTTTTGCGTGA	280
SieSSR245	16719223	JK579472	2	16809621	p3	(AGT)8	TCTTTGAAAGGCGGAGCTTA	60.089	CTCAGGCCAACCCTGAATTA	247	uncharacterized protein [Zea mays]
SieSSR246	16719224	JK580016	1	41834324	p3	(GAG)6	TTGATCGTAGCAAGCACTGG	60.011	CCTTCTGCTCAAGAACCTGG	243	hypothetical protein [Oryza sativa Indica Group]
SieSSR247#	16719225	JK580163	NA		p2	(GA)11	CTGACTGCGAGGTTCCTGTT	60.444	CTGAGGTCAGAAGTTTCGGC	147	hypothetical protein [Sorghum bicolor]
SieSSR248	16719226	JK580219	8	40444132	p3	(GAT)6	ATAGCATCGAGAACATCGGG	60.059	TGTGATCCTTTTGTCGCTCA	120	susceptibility transcription factor RVS1 [Oryza sativa]
SieSSR249#	16719227	JK580299	3	49574068	p4	(GTTC)5	GATCAAGTTTTCCGCAGACC	59.676	CGCAAGAGAGGGCTACTTGT	226	hypothetical protein [Sorghum bicolor]
SieSSR250	16719229	JK580444	3	2437204	p3	(TGT)5	GGAGCATTTGGACAAAGGAA	60.051	ATCAACCCCAACCATAAACG	193	hypothetical protein [Sorghum bicolor]
SieSSR251#	16719230	JK580658	9	5300986	c	(TC)9cctcc(CT)7	TGTGCTTGAGAATCCTGTGC	59.992	CGCGCTTAAACAAGAAAACC	121	SWIb domain-containing protein [Zea mays]
SieSSR252	16719231	JK580738	9	36896668	p2	(AT)6	GCCATAGCTGGTTTCTCAGC	59.985	ATCCAGGGAGCCTTTCAACT	229	hypothetical protein [Sorghum bicolor]
SieSSR253	16719232	JK580833	5	25410861	p3	(ATG)5	TTTTGCATTCATCCTGGACC	60.843	AGAGGATGCATACCACCAGC	276	putative transposase [Zea mays]
SieSSR254*	16719233	JK580929	6	33791491	p2	(GC)6	TGGGTATAAGGTCGGGACTG	59.807	TGCAGCTACAAGCTCACAACA	105	uncharacterized protein [Zea mays]
SieSSR255	16719234	JK581158	2	11122927	p3	(GAG)5	AAGCATCTACCTCACCAAAGG	58.331	TCAGCAGCTTATTGACACGG	204	hypothetical protein [Streptomyces scabiei]
SieSSR256	16719235	JK581205	4	37980043	c	(CCG)5cctccgtctccgcctcgaagcagcactcgcctatcgtcggcgactgattgtgcagtgtgcttgactgctcgtatc(T)10	CCGCCACGGAGAACTATAAA	60.089	AAAGCTGCAGATCGCAAAAC	205	hypothetical protein [Sorghum bicolor]
SieSSR257a*	16719236	JK581642	6	29413876	p2	(GT)6	ATAAGCAACCGAGCAGAGGA	59.978	CCAGACTTGTCAGACACGGA	134	hypothetical protein [Sorghum bicolor]
SieSSR257b*	16719237				p3	(GAT)5	TCCGTGTCTGACAAGTCTGG	59.864	GGGAGGGCAGAAAATAAAGC	227
SieSSR258	16719238	JK581654	6	879960	p2	(GT)7	GACTGGGGAGTGATGATGGT	59.774	GAAAGGGGAGCAGACTGTGA	272	No homology
SieSSR259	16719239	JK581659	9	56461225	p4	(ATAC)5	ACTTTGCAAGGGAGAAAGCA	59.993	ACTGGTTGTTCCCTGACCTG	165	hypothetical protein [Oryza sativa Japonica Group]
SieSSR260	16719241	JK581841	5	26364065	p3	(GAA)5	GAGGAGGAGGGGAAAGAGAA	59.749	AGCAATGTCACTGCCAACAG	177	hypothetical protein [Sorghum bicolor]
SieSSR261	16719242	JK582386	9	35496894	p2	(GC)6	CACGACGAACTCAGCTAACG	59.658	ACTCGCTTGCCCTTTCATTT	104	putative o-methyltransferase ZRP4 [Oryza sativa Japonica Group]
SieSSR262#	16719243	JK582489	7	24297893	p3	(AGA)7	ACCGAAGGTTCAGGATGATG	59.927	TGGGACTGAATCTTTCCCTG	280	uncharacterized protein [Zea mays]
SieSSR263	16719244	JK582501	3	4287280	p3	(GCA)7	ATCGATTTCGATCCCATACG	59.745	ATCCTCAGAATCATCGGTCG	228	1-aminocyclopropane-1-carboxylate oxidase [Sorghum bicolor]
SieSSR264	16719245	JK582553	3	42622169	p3	(CGC)6	GTTTCGACAGAAGACTCGGG	59.844	AGCAAGTTCAGGAGGCAAAG	121	50S ribosomal protein L21 [Zea mays]
SieSSR265	16719246	JK582567	5	47065022	p3	(CCA)5	ACTCCCTCTGTGCTCTGCTC	59.738	CTCGATGTAGCAGAAAGGGC	249	hypothetical protein [Sorghum bicolor]
SieSSR266	16719247	JK582629	7	30804036	p3	(AGC)5	TCGACTTCTGGACTCCGTTT	59.844	TGGATGAACCTGGAGAATGA	274	hypothetical protein [Sorghum bicolor]
SieSSR267	16719248	JK582735	2	28749448	p2	(AT)7	AGGTGTCTATCCGGCATTTG	59.955	CTCCCTCCATCCTGAAATGA	264	unknown [Zea mays]
SieSSR268	16719249	JK582853	5	10611135	p3	(GCA)5	GCTGCAATGGTGATACATGG	59.955	CACATAGGCCAGCAGCTGTA	258	hypothetical protein [Oryza sativa Indica Group]
SieSSR269	16719250	JK583068	1	29394888	p3	(GGC)5	CGAGTTGAGGCCAAACTGAT	60.255	AGCTGATTCGAGACCTAGCG	166	uncharacterized protein [Zea mays]
SieSSR270	16719252	JK583318	4	40165048	p3	(TCC)5	GCTCCTTCCTCTGCAGCTTA	59.859	GGGAGATTTGGAGGAAGAGG	176	No homology
SieSSR271#	16719253	JK583383	5	25602774	p2	(CT)8	ATTCCTTTCTTTCCCATCGC	60.399	ATGAATCATCCGCAAACCTC	246	hypothetical protein [Sorghum bicolor]
SieSSR272	16719254	JK583390	4	14198832	c	(AGA)8aagataaggctgaatcaggatcggcggaactgaaggaggagaaggttgatgtggctgacgagaaggatggaagcgaaaagaaa(AAG)5	GGCTGATTGAGAAGCTGAGG	60.096	GGGTTTGAGCAATCTCTGGA	277	putative NF-E2 inducible protein [Oryza sativa Japonica Group]
SieSSR273	16719255	JK583457	5	45969667	p3	(CCG)6	CAAGGCTCGAACGAAGGTAG	60.008	GCACAATCAGAGGGTTCGAT	157	hypothetical protein [Sorghum bicolor]
SieSSR274	16719256	JK583480	7	23954511	p3	(CGC)5	GTTGCCAAAGAATTTCCTCC	58.622	ACGAAGCTATGTGTGGGACC	222	senescence-associated protein DIN1 [Zea mays]
SieSSR275	16719257	JK583952	8	35556277	p2	(AT)6	CAGCTAGCACACAAATCCGA	60.011	CGGATTTCCTACAGCGAGAG	225	yellow endosperm1 [Zea mays]
SieSSR276	16719258	JK583976	3	8172299	p3	(GCT)5	ATCATTTGTAGCAGGCAGGG	60.096	CTGATCAGGGCGGGATTTAT	197	TPA: hypothetical protein [Zea mays]
SieSSR277	16719259	JK584074	6	32175205	p3	(GAA)5	TAACACACACGCTTTCTCGG	59.904	AAGGCGAGGAGGAAGAAGAG	197	No homology
SieSSR278	16719260	JK584076	3	214562	c	(TCA)5gctgaaacaga(TCT)8	AGAAGGCCTGCCACTACTCC	60.786	GCCATATATGATTGGTGGGC	245	hypothetical protein [Sorghum bicolor]
SieSSR279#	16719261	JK584238	4	1044764	c	(TTGCT)5tggc(CA)6tcgcatcgcgtcgcgctgcattgcatggtatggtaccactggtagttcagttcatcatgtgaggatgcatgtgagag(T)10	CTAGCTAGCTTTGCGCCG	60.014	CACTTCACTTGCCCTAAACCA	277	unknown [Zea mays]
SieSSR280*	16719263	JK584277	5	43826770	p3	(TCT)26	GGTTGGGGTATCAAGAACTGA	58.898	GTCTCCTTGGCCTGAAACAG	160	hypothetical protein [Sorghum bicolor]
SieSSR281a	16719264	JK584529	9	337127	p3	(TAC)5	AGAGGCAACCGAAATAGGCT	60.228	CAGCAGAAGTTTCCACCGAT	254	hypothetical protein [Sorghum bicolor]
SieSSR281b	16719265				p1	(A)10	AGCCGAAACTGCTCACATTT	59.882	AGCCTATTTCGGTTGCCTCT	275
SieSSR282*	16719266	JK584664	3	48155142	p3	(GCT)7	CATGGCCTGTCTCTCCTCTC	59.945	CAAGGCCATGGAGAATCTGT	130	uncharacterized protein [Zea mays]
SieSSR283#	16719267	JK584781	6	34024903	p2	(GA)8	AGGCAGGAGCTACTCAACCA	60.012	CTCCTACCAAATCTCGCAGC	141	uncharacterized protein [Zea mays]
SieSSR284	16719268	JK584830	7	23816542	p3	(AGC)6	GCCAACATTGGTAAAATGGG	60.053	AAGCCCCTTCATCTTCAGGT	252	hypothetical protein [Sorghum bicolor]
SieSSR285	16719269	JK584910	8	696275	p2	(AG)6	CCGACTATTCTTGCTCCTCG	59.971	GTGGAAAATGGAGCAGGAGA	227	hypothetical protein [Oryza sativa Japonica Group]
SieSSR286	16719270	JK584965	1	41272823	p4	(AAAG)5	GCAAGCAAAGCAAGGAAAAC	60.003	GCTTCCCCTGCTAGTGTCAG	227	No homology
SieSSR287	16719271	JK585087	NA		p3	(CGC)5	AATCACGAGGGAGGTGAATG	59.927	CGTGAAGATCAGAAGGGAGC	101	unknown [Zea mays]
SieSSR288	16719272	JK585096	2	45433118	p3	(GGC)5	CCGGGGATTATTTAGGGTTC	59.507	TGTGTTGTCCACGACCAGAT	265	hypothetical protein [Sorghum bicolor]
SieSSR289	16719273	JK585242	2	19920975	p3	(TTG)5	AATGTGCCTGAACCTTGAGC	60.263	ACACCATGTCCGAGCTTACC	184	hypothetical protein [Sorghum bicolor]
SieSSR290	16719275	JK585290	NA		p3	(GTC)5	GTGACAAGGCGTGACTCGTA	59.905	TCGAACTCAACTCGAACACG	186	hypothetical protein [Sorghum bicolor]
SieSSR291	16719276	JK585372	7	24720979	p3	(CTT)5	CGCCAGTTTGTGTTATGGTG	60.027	TCGTTGGTAAAATCCTTGGC	260	No homology
SieSSR292#	16719277	JK585492	9	52011070	p3	(TGA)10	AAATGGAGGTGAACCTGCTG	60.111	CGCAAACACAAGCTAAAGCA	218	hypothetical protein [Zea mays]
SieSSR293	16719278	JK585493	9	52011287	p3	(CAT)10	CGCAAACACAAGCTAAAGCA	60.191	AAATGGAGGTGAACCTGCTG	218	hypothetical protein [Sorghum bicolor]
SieSSR294*	16719279	JK585578	3	22657625	p2	(TG)6	CGTCGTGGTTTCTGTCTGTG	60.348	AGAAATGGGTTCTCGAGGGT	188	hypothetical protein [Zea mays]
SieSSR295	16719280	JK585796	9	870792	p3	(GAC)5	GAAGCTGCCCATAAGCAAAG	59.982	ATAGCATCCTCCCTGCTTCA	157	hypothetical protein [Sorghum bicolor]
SieSSR296*	16719281	JK585857	7	22635147	p3	(GGT)5	TTTCTTCCTCCATTGCTGCT	59.955	TACCTGGGCATCCTCATAGC	121	uncharacterized protein [Zea mays]
SieSSR297	16719282	JK585920	7	19403324	p3	(GAG)5	GGTGAAGGAGGGAGTGATGA	60.048	AGGTACCCGCTCTAAGCCAT	188	hypothetical protein [Zea mays]
SieSSR298	16719283	JK586291	2	43969302	p2	(GT)7	CAGAGCCCTAACACCCTCTG	59.861	CCCTAGAACCAGACGACCAA	194	hypothetical protein [Sorghum bicolor]
SieSSR299	16719284	JK586459	4	881532	p2	(CA)7	CGGTGAAATGCTCTCACAGT	58.882	GGCGTTTCCATATGTGCTTT	210	No homology
SieSSR300*	16719287	JK586720	8	37998382	p3	(TTC)6	GTGGTTTGGTGGAATCGAAC	60.218	CTGCACTGAGGCACACAATC	216	hypothetical protein [Oryza sativa Indica Group]
SieSSR301	16719288	JK586732	3	48954298	p3	(GGC)7	CCTCTTCTTCCTCGTTGCTG	60.126	CGGACTGTCACGATGTTGAG	210	TPA: hypothetical protein [Zea mays]
SieSSR302#	16719289	JK587410	2	12212401	p3	(GCA)10	ACTGCTGCACAAGCATCATC	60.024	GCCTGCATATTCCCGTACAC	242	hypothetical protein [Sorghum bicolor]
SieSSR303	16719290	JK587856	3	24885686	p3	(CTG)5	AGAAGGAGAGGGCTCAAAGG	59.95	CTGTTTGGCCATGAAGGTCT	209	hypothetical protein [Oryza sativa Japonica Group]
SieSSR304	16719291	JK588068	2	3307494	p2	(AC)8	AACCACAACAACATCAGCCA	60.008	ACAATCTGAAAGGGCATTCG	260	hypothetical protein [Sorghum bicolor]
SieSSR305	16719292	JK588299	2	36361011	p3	(TTC)5	CGTATGAAAACAATGTGGCG	59.992	GTTTTCGCCAAACACAACG	178	No homology
SieSSR306	16719293	JK588557	9	221033	p2	(AC)6	TTGCTTACAGTTTGCATCGC	60.021	GGGTTGATTATTGGTGTGGC	227	hypothetical protein [Sorghum bicolor]
SieSSR307	16719294	JK588565	1	216089	c	(A)10tgaaatggcactgtacagcaagttgagttcacctgagctcatcagggtgcatctcaatcaatagactgaccggctactggatacatacatacatg(CATA)5	CATGCTCTCCTGAGCACGTT	61.566	GCTCCATGATCAATTTGCCT	206	No homology
SieSSR308	16719295	JK588639	7	26118143	p3	(TGG)5	GAAGGAATCAAGGGCCTCTC	60.154	TCTCATTGCACTGGTTGAGG	247	hypothetical protein [Sorghum bicolor]
SieSSR309	16719296	JK589329	3	50617870	c	(CTT)5ttcattttaatgatgatgacatggcatttgctggtgattattgctgttccc(T)10	CCATCCTGCCTACATCTCGT	60.096	AAGCAACTCCTCACCAAACC	236	uncharacterized protein [Brachypodium distachyon]
SieSSR310	16719298	JK589539	7	19403324	p3	(GAT)5	GGTGAAGGAGGGAGTGATGA	60.048	CAGGGTGAAAATTGCCAGAT	163	hypothetical protein [Zea mays]
SieSSR311	16719299	JK589671	7	25938788	c	(T)10aatttctcttcctgtgctttgtaggagggaggtgaatgcatgcttttcaaggatggcctcta(CGC)6	GCACTTATGCTGCCTGATGA	59.979	GTCCGTGAAGATCAGAAGGG	159	uncharacterized protein [Zea mays]
SieSSR312	16719300	JK589748	9	41984167	p3	(TGC)6	TACCAAGGGTGTGACGTGAA	60.001	TTTGCGACTACTGGATGCTG	207	thioredoxin h-like protein [Zea mays]
SieSSR313*	16719301	JK589749	9	41983961	p3	(AGC)6	TTTGCGACTACTGGATGCTG	60.011	TACCAAGGGTGTGACGTGAA	207	hypothetical protein [Sorghum bicolor]
SieSSR314	16719302	JK589788	5	25162531	p2	(TC)9	GGGTGTTAGGCACTCTAGCC	58.817	TGCGAATCAATGTCTTCCTG	236	hypothetical protein [Zea mays]
SieSSR315	16719303	JK589798	5	25078390	p3	(CTG)5	CTCTGGTGGCTCAACTGTCA	60.022	CCCTGCAATTCTGCGTTATT	269	hypothetical protein [Sorghum bicolor]
SieSSR316	16719304	JK589827	3	20671186	p2	(AT)6	GGCACACCCTGAAGATGAAT	59.934	CGGAAGCAGAATGTGACAAC	223	hypothetical protein [Sorghum bicolor]
SieSSR317a	16719305	JK590354	9	13594447	p1	(A)12	GCGCGGTTAAAGAGAACAAG	60.018	TGCTCCCATGCAACAATCTA	143	hypothetical protein [Sorghum bicolor]
SieSSR317b	16719306				p3	(GTC)5	GGCAGTTCTCTTCCTCATGC	59.957	GAGCCCTTATTACCGCCTTC	280
SieSSR318	16719307	JK590469	2	13905621	p3	(ATC)5	GAATTTGGCTTCCTTCCTCC	60.017	TGAAGGATTCTACCCACAGGTT	178	hypothetical protein [Zea mays]
SieSSR319	16719308	JK590598	5	5132354	c	(AGA)5aaaagaaagacaagggtgaatcaggatcagctgaggccgtggaggtcaaggaggaggtcgatgtggcagatgagaagggcagcgggaagaaa(AAG)5	TTGAGGAAGCTGCTGAGACA	59.855	CAGCTTCTGCAACATCTCCA	225	No homology
SieSSR320a	16719310	JK590619	5	7029258	p2	(AG)8	GGTCAGCTGGATGTTTGGAT	59.934	GCAAGCCACAAGCCTATCTC	185	uncharacterized protein [Zea mays]
SieSSR320b	16719311				p1	(T)12	TCCCAGATTTCCCTTCTCCT	60.008	ATCCAAACATCCAGCTGACC	172
SieSSR321*	16719312	JK591193	5	44270043	p3	(AAG)5	CCGCTCTCTTTTCCTCTCCT	60.088	GTTGGCAATTCAGAGCTTCC	247	hypothetical protein [Sorghum bicolor]
SieSSR322a*#	16719313	JK591338	9	46908718	p2	(AG)6	AAATATAAGAAAGTTGTTCCGACG	57.953	TGCTGCCACATCAGAGTTTC	259	hypothetical protein [Sorghum bicolor]
SieSSR322b	16719314				p2	(TA)10	CATAAATCACGCAAACCACG	59.992	TGCCCACAATTCACTCACAT	236
SieSSR323*#	16719315	JK592149	2	39890010	p3	(TGC)9	TGAGGGAAGTTGGGATTCTG	60.042	GGCATCCACAAAGGAGTCAT	205	uncharacterized protein [Zea mays]
SieSSR324	16719316	JK592505	1	6582044	p3	(TGC)5	CCTAAGTTCAGGGACCACCA	59.959	GTATGGTGGTCAGCAGGGTC	161	hypothetical protein [Sorghum bicolor]
SieSSR325	16719317	JK592734	3	15515675	p2	(GT)7	AGCACAGCAATAACATGGCA	60.288	AACACGATGATCAGCAGCAG	190	hypothetical protein [Sorghum bicolor]
SieSSR326	16719318	JK592793	9	51791096	p3	(CCA)5	CAGCAGAGCCATAGGTGACA	60.008	GCCTAGGGATGACTCTGCAC	227	hypothetical protein [Sorghum bicolor]
SieSSR327	16719319	JK593091	9	8006811	p2	(GT)6	CTACACGCTGCTGTATCCCA	59.888	CGACCTCTACAAGCTCCCAC	240	No homology
SieSSR328	16719320	JK593232	3	21246748	p3	(AAC)5	TTTGGAGCTTTTGGGAAATG	60.046	CATCGAGGCCTTCTATCTGC	277	SWIb domain-containing protein [Zea mays]
SieSSR329*	16719321	JK593372	7	33499366	p3	(CAC)5	GCAAGCACCACCATCCTATT	59.962	GTGCTTGTGCTCCTTCTCCT	236	hypothetical protein [Sorghum bicolor]
SieSSR330	16719323	JK593552	7	30437419	p2	(TA)6	TGACCTGATGCATGCTAACC	59.679	GCGAGTCAGTAGTGGAAGCC	257	hypothetical protein [Oryza sativa Indica Group]
SieSSR331	16719324	JK593726	7	32126557	p3	(GAC)5	AGGCTCCTCAGGTTCGAAAT	60.212	GGTGCCTGGAGTGTAAGGAG	174	unknown [Zea mays]
SieSSR332#	16719325	JK593811	3	21595334	p2	(TC)12	GCCGCCCTTCTCTCTCTTA	59.662	TCACCAGCGTCAGTTGTAGG	240	TPA: hypothetical protein [Zea mays]
SieSSR333#	16719326	JK594046	NA		p3	(CCG)8	ATCCTATGATAACGCTGCCG	60.081	GCGTCATCAGAACAAGCAAA	228	hypothetical protein [Sorghum bicolor]
SieSSR334*	16719327	JK594354	3	14573013	p2	(AT)8	GCGTAGTTATCCACTCCCGA	60.096	CGATGCAGTTTGGGAAGTTT	139	S28 ribosomal protein, partial [Triticum aestivum]
SieSSR335	16719328	JK594376	7	3307652	p2	(TG)6	GCTCCCGACATTGAAAGGTA	60.074	TTTACAGGGCAAATCCATCC	273	hypothetical protein [Sorghum bicolor]
SieSSR336#	16719329	JK594458	4	30405775	p3	(AAG)5	GACCCCAGCCAAAAACTGTA	59.971	CCAGGACAAATGGCTGACTT	169	MYB protein [Saccharum hybrid cultivar Co 740]
SieSSR337*	16719330	JK594482	1	154000	p3	(GAG)6	TCTATCCGCTCATCCAATCC	59.998	TAGGGAACATTTCGAGCACC	244	hypothetical protein [Sorghum bicolor]
SieSSR338a	16719331	JK594626	5	1594688	p3	(AGA)5	GATGAAGATGAGGCTGAGGC	59.917	CATGTCAAAACAGCCCCTTT	225	unknown [Zea mays]
SieSSR338b	16719332				p2	(CA)6	GGAGAGGCTGCTTACACCTG	60.012	TTGTGGGAGAAATTGAAGCC	146
SieSSR339	16719333	JK594828	5	32298206	p2	(CT)7	TCCTGCTTTGCTTTCTTGGT	59.993	AAACACACCGATCATCACGA	213	hypothetical protein [Sorghum bicolor]
SieSSR340	16719335	JK594829	5	32298892	p2	(AG)7	AAACACACCGATCATCACGA	59.967	TGCTTTGCTTTCTTGGTGTG	210	No homology
SieSSR341	16719336	JK594900	6	25136066	p3	(GTC)7	CGACAGAGAGGAGGGTTCTG	59.978	AATCAGCAGCATGCACACAC	200	uncharacterized protein [Zea mays]
SieSSR342	16719337	JK595002	5	32208824	p3	(GCA)6	GTCTGGTGGCATGCCTATTC	60.492	TATCATCCGCACATCTTCCA	257	hypothetical protein [Sorghum bicolor]
SieSSR343*	16719338	JK595089	4	9472674	p3	(AAC)5	GCACAATAAAAGGGAACGACA	59.989	ATGTGTTTGACACGCTTGGA	194	PREG-like protein [Zea mays]
SieSSR344	16719339	JK595099	3	6460858	p3	(GAC)6	TGCAACACCAAAACCAAGAA	60.127	GTTTGGTTCATCCTCCCCTT	118	hypothetical protein [Sorghum bicolor]
SieSSR345#	16719340	JK595100	3	30129421	p3	(TCG)6	AAAAATCAAACTCCCCCGTC	60.166	TGCAACACCAAAACCAAGAA	257	unknown [Zea mays]
SieSSR346	16719341	JK595321	3	35352164	p3	(GCG)5	GAAACCTCACGCAAACCCTA	60.11	TCATCACAGGCTTGTTCTCG	207	salt tolerance protein [Zea mays]
SieSSR347	16719342	JK596054	3	11471222	p2	(GT)6	GCGTGTGTGTGCTGTTCTCT	60.104	ACCATGAAGTGTGTCCACGA	172	uncharacterized protein [Zea mays]
SieSSR348a	16719343	JK596221	3	3537619	p3	(GTC)5	AGTTTAATTTCGTTCCCCCG	60.177	CGATCGATCAACAATCAACG	104	hypothetical protein [Sorghum bicolor]
SieSSR348b	16719344				p3	(AGC)5	GCAGCAACAAGGAAAGGAAG	59.993	AAGGTGAGGAGGAGGCAGAT	161
SieSSR349#	16719345	JK596357	3	4153202	p5	(CGCCT)5	CTAGGGTTCTTCCTTCACGC	58.934	TAACTTCCTGTTGTTCCGGC	218	TPA: hypothetical protein [Zea mays]
SieSSR350#	16719347	JK596500	9	8964640	p3	(AAC)6	AATCTGACATTCCTCACCGC	60.081	AAGCAGCAGCATCTGGAAAT	231	RING finger protein 5 [Zea mays]
SieSSR351	16719348	JK596709	5	18675665	p2	(GC)6	GCAATCAAGAGAAGTGCATTATT	57.613	AGGATGTCCAGGGAGAGGAT	147	hypothetical protein [Sorghum bicolor]
SieSSR352#	16719349	JK596775	1	121131	p4	(ATGT)5	ATCAGCTGGAGCCACACTCT	60.017	GTACGTTCAGCGCAGAAAAA	107	DNA-binding response regulator [Clostridium botulinum F str. Langeland]
SieSSR353	16719350	JK596961	5	28249668	p3	(ACC)6	AGACAAATAACGACGACGCC	60.14	GAACTGCCACAGAACAGCAA	232	hypothetical protein [Sorghum bicolor]
SieSSR354	16719351	JK597162	1	33821853	p2	(AG)8	GCTTCAAGAAACCAACGAGG	59.853	GGATCAAATGGCTACTTGGC	191	hypothetical protein [Sorghum bicolor]
SieSSR355	16719352	JK597626	7	18942289	p3	(CTG)5	AGCAGTATGCTTGGACGGAT	59.723	GGGAGGATAGACATGCAGGA	224	No homology
SieSSR356	16719353	JK597716	NA		c	(TCT)5ttttcttttcgcttccatccttctcgtcagccacatcaaccttctcctccttcagttccgccgatcctgattcagccttatct(TTC)8	TCCGCATCTCGACTCTTCTT	60.096	GCTGCTGAGGTAGTGGAAGG	269	hypothetical protein [Zea mays]
SieSSR357	16719354	JK597730	9	58599711	p3	(GAG)6	AGTCAACCAGGGAGAAAGCA	59.844	GAACGATCCAAGCTTCTTGC	280	uncharacterized protein [Zea mays]
SieSSR358*	16719355	JK597801	5	675994	p2	(GT)7	CGTGCTCTGAGGTCTGACTG	59.757	CCAAGGCTCAGGCTGTTATT	171	hypothetical protein [Sorghum bicolor]
SieSSR359a	16719356	JK597832	9	50744021	p1	(A)10	GATGGGGATCTGGGTTCTTT	60.133	GCTGTGGCGTCTGATTTCTT	160	putative RING zinc finger domain superfamily protein [Zea mays]
SieSSR359b	16719357				p3	(TCT)5	GGGAAGGAGGCAGATTAGGT	59.536	TTCCACATCTACATCGCAGC	150
SieSSR360	16719359	JK597896	9	40838122	p3	(TGC)5	GGAATCTAGCAAGTCTGCCG	59.978	CTGGCATCATCATCACCAAG	222	hypothetical protein [Sorghum bicolor]
SieSSR361*	16719360	JK598022	2	17097991	p3	(TAG)5	GTGATGTGCTGCCTGAAGAA	59.992	CGAGCATTCCACCACCTAGT	227	hypothetical protein [Sorghum bicolor]
SieSSR362	16719361	JK598036	7	35823018	p1	(T)13	AGATCATCCTGGCATTCTGG	60.034	CTGAGCCATCTTACATGCCA	237	hypothetical protein [Sorghum bicolor]
SieSSR363#	16719362	JK598088	NA		p2	(GA)23	CAGCATGTCAGGGACAAATG	60.112	GCATGCTAGCCAAACACAAC	274	uncharacterized protein [Brachypodium distachyon]
SieSSR364	16719363	JK598137	5	6169496	p3	(CAC)6	GAAGCCCTAGATGAGGACCC	60.037	ACAAAGGCCATACACAAGCC	176	No homology
SieSSR365	16719364	JK598383	1	37574679	p3	(GCT)5	CGTGGTTCTTGGCTGGTAAT	59.993	CCAACCCCTGATAGTCTCCA	248	No homology
SieSSR366	16719365	JK598411	1	41163472	p3	(CCG)5	AAGAGAGCAACAGCAGCACA	59.929	GCTTCGGGTCAAGATTCAAG	201	No homology
SieSSR367	16719366	JK598951	6	28460831	p3	(TGA)5	GAAGATTCCGAACCTGGTGA	60.05	AACCTGCAATAGCCCATGAC	148	hypothetical protein [Zea mays]
SieSSR368#	16719367	JK599298	4	40167922	p3	(GAC)7	TGATCCCAACTCCAATCCTC	59.862	ATTGGACAACCCTCCTTCCT	262	hypothetical protein [Sorghum bicolor]
SieSSR369	16719368	JK599350	9	42437416	p3	(GAA)6	CCAAAACTTCTCCCATCCAA	59.903	GTGTTGGACCTGGACATCCT	104	uncharacterized protein [Brachypodium distachyon]
SieSSR370	16719370	JK599419	4	12832432	c	(TGA)5(AGA)8	TTGACATTAAGCGGGGAAAC	59.938	CTGCATCGCTTTCTACCTCC	135	hypothetical protein [Sorghum bicolor]
SieSSR371#	16719371	JK599950	3	2684719	c	(CT)6cg(CT)8	CAACGATGCGATAGCAGGTA	59.856	AAGCAGGCAAATGGAGACAC	263	hypothetical protein [Sorghum bicolor]
SieSSR372a	16719372	JK600099	8	1673471	p3	(CAG)6	CAGATGCCTGGAAGAAGGAG	59.943	TTGCAGCTAACTGTGCCTTG	274	uncharacterized protein [Zea mays]
SieSSR372b	16719373				p1	(A)10	GGGCTGTAAAGTCAAACTCAAGA	59.812	CTCCTTCTTCCAGGCATCTG	172
SieSSR373#	16719374	JK600315	4	12832429	p3	(GAA)8	ACATTAAGCGGGGAAACTCC	60.32	GCTTCGAAATGTTAGCCAGC	183	hypothetical protein [Sorghum bicolor]
SieSSR374	16719375	JK600593	8	21538078	p3	(GAG)5	TGACATGATCAAGGGCAAGA	60.201	TTTCAATCACTCGAAAGCCC	124	uncharacterized protein [Zea mays]
SieSSR375*	16719376	JK600622	2	43619210	p2	(AG)6	GGCACCACAGTCCACAGATA	59.551	TGAGATGCGTAACCTGCAAA	149	No homology
SieSSR376	16719377	JK600641	7	22635267	p3	(CAC)5	TACCTGGGCATCCTCATAGC	60.059	TTTCTTCCTCCATTGCTGCT	121	uncharacterized protein [Zea mays]
SieSSR377	16719378	JK600888	5	41344330	p3	(CAG)5	CAGCAACATTTTCTCCAGCA	59.988	GATCTTCCACCTCAGGGTCA	243	uncharacterized protein [Zea mays]
SieSSR378*	16719379	JK600983	7	18231793	p3	(CAG)6	AGCAAGAAGCAAATCGTCGT	60.022	ACCACTTTCAGTGCCTGGTC	260	hypothetical protein [Sorghum bicolor]
SieSSR379	16719380	JK601088	1	41872472	p4	(ATGT)5	AAACAAACAATGGAGGCTGG	59.971	CCTGATCAACAAACAATCCG	258	No homology
SieSSR380	16719382	JK601262	3	19097586	p3	(TCC)5	CAACCACCTCAGAACAAGCA	59.873	CTCGATCAGGCTACGGCTAC	184	hypothetical protein [Sorghum bicolor]
SieSSR381	16719383	JK601491	7	35234797	p2	(AG)7	GCGAAGGTGGTCCTGTAAAA	60.11	TGTTCATGGCAACAACAGGT	183	hypothetical protein [Sorghum bicolor]
SieSSR382#	16719384	JK602594	NA		c	(AC)6(AT)6	ACTGTCATCTCGCCCAAAAA	60.636	AGCGACGAATGGAGAGGTAA	175	hypothetical protein [Oryza sativa Japonica Group]
SieSSR383	16719385	JK602599	5	43725517	p3	(CCG)5	ACGACGCCTGATCCCTTC	61.201	TGTGGTGCATACGTTGGTTT	245	50S ribosomal protein L13 [Zea mays]
SieSSR384#	16719386	JK602626	1	38479590	p2	(CT)9	CCCCTCTCTCTCGTCTCCTT	59.945	GTGGCGAAGGCATATCATCT	241	elongation factor gamma1 [Zea mays]
SieSSR385	16719387	JK602687	8	36031762	p2	(TG)6	GCGCATATATGGATCGGAGT	59.914	ATTCGCTATGAACCAGGCAC	280	uncharacterized protein [Zea mays]
SieSSR386	16719388	JK602689	3	23640840	p3	(CAC)8	GCTTCGCAGCTTCTCCATAC	60.125	AGCCGAATGTTGTTCTTTGC	138	No homology
SieSSR387	16719389	JK602912	7	33667147	p3	(CAG)5	ATATCTGCAGGGCAAGCTGT	59.866	TGGATGGACTCTGGTGATGA	184	unknown [Zea mays]
SieSSR388	16719390	JK602998	1	41734275	p3	(AAG)6	CATCCACACCTAGACGACGA	59.701	TCCCATCCAAATAGCCGATA	238	hypothetical protein [Sorghum bicolor]
SieSSR389	16719391	JK603045	5	38198780	p3	(GAC)5	GAGGATAATGAGTACCAGGAGTACC	58.559	TCTTCTTGCTGCTTGGGTCT	133	No homology
SieSSR390#	16719393	JK603129	1	38768422	p3	(GTT)5	ACAACGTTGCGATGTCAAGA	60.31	TGTGTGCTGGCATACATCAA	140	pentatricopeptide (PPR) repeat-containing protein-like [Oryza sativa Japonica Group]
SieSSR391	16719394	JK603664	7	1846969	p3	(TGC)5	AGCATGCAACAACACGAGTC	59.912	TTTTCGATCACAAGTGCAGC	215	TPA: hypothetical protein [Zea mays]
SieSSR392	16719395	JK604609	5	32431836	p3	(GCA)5	GCGGTTACTCAACTTGCACA	59.911	GCTGTAGCTCTGGTTGAGGG	157	hypothetical protein [Sorghum bicolor]
SieSSR393	16719396	JK604631	3	21766027	p3	(GCT)5	GGCAGACAATGTGGTTGTTG	60.008	CTAACAGATGGAGCCCTTGC	261	acetyl-CoA C-acyltransferase-like protein [Zea mays]
SieSSR394	16719397	JK604632	3	21765556	p3	(GCA)5	CTAACAGATGGAGCCCTTGC	59.836	GGCAGACAATGTGGTTGTTG	261	small nuclear ribonucleoprotein Sm D2 [Zea mays]
SieSSR395	16719398	JK604814	1	10254113	p2	(GT)6	TTTCCTATGTTGGGGAGGTG	59.784	TTCCATTAAAAAGTGCCATCG	253	uncharacterized protein [Zea mays]
SieSSR396	16719399	JK604914	1	41930044	p3	(GGC)7	GACGACGACACGACAAGAGA	60.03	CGAATCTGAGGAGGAAGTCG	202	hypothetical protein [Sorghum bicolor]
SieSSR397	16719400	JK605273	4	37374958	p3	(GAT)5	TTTGACATGGAGCTTGAGGA	59.369	CGCACACAACCACCATTAAG	124	hypothetical protein [Oryza sativa Indica Group]
SieSSR398	16719401	JK605565	9	337127	p3	(TAC)5	AGAGGCAACCGAAATAGGCT	60.228	CAGCAGAAGTTTCCACCGAT	254	hypothetical protein [Sorghum bicolor]
SieSSR399	16719402	JK605676	1	135820	p3	(CTA)5	ACATTGAGAACCGAACTGCC	60.119	TAGAGCATAATCCGGGATGC	152	hypothetical protein [Oryza sativa Japonica Group]
SieSSR400	16719405	JK605914	1	41405940	p2	(GA)6	GTAGCCACCCTTGGATGAAA	59.933	GATCCGGGAAATAAGCCAAT	101	hypothetical protein [Zea mays]
SieSSR401*#	16719406	JK606486	1	41499876	p4	(ACAG)5	TGCTGAAATGGCAATGGTTA	60.073	ATTCTCAAGGGCAAGCAAAA	223	No homology
SieSSR402*#	16719407	JK606508	7	25282571	p2	(AC)9	GGTGCAAGAGCTACCAGAGG	60.012	CATGCACTTGTTGTTTGCG	158	hypothetical protein [Arthrobotrys oligospora]
SieSSR403#	16719408	JK606695	6	1584384	p2	(CT)8	TCCCTTGCACTTGCACATAA	60.257	AGCTTCTGACAGGGGAAACA	279	transcription factor/ transcription initiation factor [Zea mays]
SieSSR404	16719409	JK606912	5	43633435	p3	(GAT)5	CGTGAAGAGAATCTGGGAGC	59.95	ATGGTCCCTTGTATGCTGGA	261	lipoxygenase1 [Zea mays]
SieSSR405	16719410	JK606971	9	5943709	p3	(ATC)5	GCTCGTTAGGCAACTTAGCTGT	60.102	TTGACGACCCTCTGGATTTC	149	hypothetical protein [Sorghum bicolor]
SieSSR406	16719411	JK607118	3	6860581	p3	(TGG)5	TTGGCAATAGTGGGATTGGT	60.192	GATTAGTTGGTGGCTTCCCA	193	unknown [Zea mays]
SieSSR407#	16719412	JK607220	6	30858132	p3	(CTC)5	CTTCTCCCCTCGTCTCCCT	60.733	GTTCTTGTCCGGATGGTGTT	176	vacuolar protein sorting 55 containing protein [Zea mays]
SieSSR408	16719413	JK607337	2	47566826	p3	(AAG)6	GGACATTGGGCCTAAGACAA	59.933	CATGCATCATGTGTCACTGC	272	hypothetical protein [Sorghum bicolor]
SieSSR409	16719414	JK607500	7	19403324	p3	(GAG)5	GGTGAAGGAGGGAGTGATGA	60.048	AAGGTGGTTGGGGGACAT	148	hypothetical protein [Zea mays]
SieSSR410	16719416	JK607729	8	26156	p2	(TA)7	AAACTGGTGGCCAACAAAAG	60.008	AAACTGCTTGCCAAATATGGTT	262	potassium efflux system KEFA [Sinorhizobium fredii]
SieSSR411*#	16719417	JK607754	1	39315530	p5	(GGTGT)5	ATGGCCACGTGTATCGTGTA	59.871	CGCTCCACACTTTGCAATAC	132	ribosomal large subunit pseudouridine synthase B [Zea mays]
SieSSR412	16719418	JK607992	NA		p3	(CTG)5	CTCATACCTCTCCGTCGCC	60.774	GTGCATCTTCTTCCAGGAGC	179	hypothetical protein [Sorghum bicolor]
SieSSR413	16719419	JK608777	5	12084965	p3	(ACA)5	GAGTCGCAGTGACACCAAGA	60.03	GGAAGGATGGAACAGTGGAA	193	No homology
SieSSR414	16719420	JK609155	9	49840947	c	(GCA)5cctcaat(CAG)5	TTAATCAGCAGCAGCAGCAC	60.31	ATGGGACCTGATTGAACTGC	264	hypothetical protein [Sorghum bicolor]
SieSSR415	16719421	JK609156	9	2876964	c	(CTG)5attgagg(TGC)5	GCTTCTACTTTCACAGGCGG	60.015	ACAGCAGCAACAGCAGCTTA	264	hypothetical protein [Zea mays]
SieSSR416	16719422	JK609493	2	36412210	p3	(CAG)5	CCAAGAAGAGCCAGTCCAAG	59.982	ACTCCCGGACTTGATGTGAG	191	GF25118 gene product from transcript GF25118-RA [Drosophila ananassae]
SieSSR417	16719423	JK609529	2	15502524	p2	(AG)6	TCACAACCAACTCAAAGCTCTTAC	59.861	ATTGGTGGTGTCGGATTTGT	199	hypothetical protein [Sorghum bicolor]
SieSSR418	16719424	JK609845	2	3099109	c	(A)10gtgttctggtcctctcctcctcccctgtactagtagtacatcagtgcttctgtacttcctgtatgtagactag(AGA)13	TCAGACTTGAGTCATCCCCC	60.048	TTTGGCTGCTCCAGGTAAAC	278	tRNA pseudouridine synthase B [Streptococcus salivarius JIM8777]
SieSSR419	16719425	JK609864	9	39322534	p3	(TCA)5	TCTAGTCCGAGTCACCTTCG	58.03	CCGAATGCGAAATACCCTAA	247	TPA: Zea mays MADS6 [Zea mays]
SieSSR420	16719427	JK609988	1	993689	p3	(AAG)5	TCATGCAGTGGTCGAAGAAC	59.837	TTTGGCTGTCTGTGACCAAG	102	50S ribosomal protein L21 [Zea mays]
*Reported in Pandey et al. [23]
#Validated set of markers
p2 - Di-nucleotide repeat motifs
p3 - Tri-nucleotide repeat motifs
p4 - Tetra-nucleotide repeat motifs
p5 - Penta-nucleotide repeat motifs
p6 - Hexa-nucleotide repeat motifs
c - Compound -type repeat motifs
NA- Not available (Unmapped)
